# Supplementary material for: Long non-coding RNA MIAT promotes breast cancer progression and functions as ceRNA to regulate DUSP7 expression by sponging miR-155-5p
Source: PubMed Central journal article supplement (PMC5652694; doi:10.18632/oncotarget.19190), 2017-07-12
Supplement: oncotarget-08-76153-s001.pdf [file oncotarget-08-76153-s001.pdf]

## Long non-coding RNA MIAT promotes breast cancer progression and functions as ceRNA to regulate DUSP7 expression by sponging miR-155-5p

### SUPPLEMENTARY MATERIALS

Supplementary Table 1: The expression of MIAT in paired breast cancer tissues

|                | MIAT |    | $\chi^2$ | <i>P</i> |
|----------------|------|----|----------|----------|
|                | -    | +  |          |          |
| normal tissues | 28   | 2  | 7.95     | 0.0048   |
| cancer tissues | 19   | 11 |          |          |

**Supplementary Table 2: Association between MIAT level with TNM stage of breast cancer patients**

| <b>TNM stage</b> | <b>-</b> | <b>+</b> | <b><i>P</i></b> |
|------------------|----------|----------|-----------------|
| I, II            | 19       | 1        | <.0001          |
| III              | 0        | 10       |                 |

**Supplementary Table 3: Association between MIAT level with Lymphnode metastasis of breast cancer patients**

| MIAT | LN |    |
|------|----|----|
|      | -  | +  |
| -    | 12 | 7  |
| +    | 0  | 11 |

Chi-square test,  $P=0.0007$ .

**Supplementary Table 4: The expression of DUSP7 in MIAT positive and negative breast cancer tissues**

| MIAT | DUSP7 |   |
|------|-------|---|
|      | -     | + |
| -    | 17    | 2 |
| +    | 5     | 6 |

Chi-square test,  $P=0.0086$ .
